## Rac1 is a downstream effector of PKC $\alpha$ in structural synaptic plasticity

Xun Tu<sup>1,2,3</sup>, Ryohei Yasuda<sup>1,2,3\*</sup> and Lesley A Colgan<sup>1\*</sup>

<sup>1</sup> Neuronal Signal Transduction Group, Max Planck Florida Institute for Neuroscience, Jupiter, FL, USA.

<sup>2</sup> International Max Planck Research School for Brain and Behavior, Jupiter, FL, USA.

<sup>3</sup> FAU/Max Planck Florida Institute Joint Graduate Program in Integrative Biology and Neuroscience, Florida Atlantic University, Boca Raton, FL, USA.

\* Corresponding author: Ryohei.Yasuda@mpfi.org, Lesley.Colgan@mpfi.org

### Abstract

Structural and functional plasticity of dendritic spines is the basis of animal learning. The calcium-dependent protein kinase C isoform, PKC $\alpha$ , has been suggested to be critical for this actin-dependent plasticity. However, mechanisms linking PKC $\alpha$  and structural plasticity of spines are unknown. Here, we examine the spatiotemporal activation of actin regulators, including small GTPases Rac1, Cdc42 and Ras, in the presence or absence of PKC $\alpha$  during single-spine structural plasticity. Removal of PKC $\alpha$  expression in the postsynapse attenuated Rac1 activation during structural plasticity without affecting Ras or Cdc42 activity. Moreover, disruption of a PDZ binding domain within PKC $\alpha$  led to impaired Rac1 activation and deficits in structural spine remodeling. These results demonstrate that PKC $\alpha$  positively regulates the activation of Rac1 during structural plasticity.

### Introduction

Dendritic spines of pyramidal neurons in the hippocampus undergo activity-dependent structural and functional plasticity that has been reported to be crucial for learning and memory (Lai and Ip, 2013; Lamprecht and LeDoux, 2004; Matsuzaki et al., 2004). This plasticity is mediated by the coordinated regulation of complex signaling networks that transduce short-lived synaptic input into long-lasting biochemical changes to modulate the strength and structure of synapses and, ultimately, animal behavior (Kennedy, 2016; Nishiyama and Yasuda, 2015).

Protein kinase C (PKC) is a family of serine/threonine kinases that have long been implicated as essential for synaptic plasticity, learning and memory (Nelson et al., 2008). Inhibition of PKC blocks LTP induction and also disrupts the maintenance of pre-established LTP (Malinow et al., 1989, 1988). In addition, pharmacologically activating PKC or overexpressing constitutively

active PKC potentiates synapses and enhances learning (Hu et al., 1987; Rekart et al., 2005; Zhang et al., 2005). PKC exists as at least 10 isozymes which are categorized into three subfamilies: the classical PKC isozymes (PKC $\alpha$ , PKC $\beta$  and PKC $\gamma$ ), the novel isozymes (PKC $\delta$ , PKC $\epsilon$ , PKC $\eta$ , and PKC $\theta$ ) and the atypical isozymes (PKC $\zeta$  and PKC $\lambda$ ). The classical PKC isozymes, ubiquitously expressed in the brain, transduce signals dependent on Ca<sup>2+</sup> and diacylglycerol (DAG) (Clark et al., 1991; Ito et al., 1990; Kose et al., 1990; Sossin, 2007). Recently, PKC $\alpha$  was demonstrated to be uniquely required for structural LTP in hippocampal dendritic spines. This specificity was defined by a four amino acid C-terminal PDZ-binding motif (QSAV). Evidence suggests that PKC $\alpha$  activity integrates neurotrophic signaling, including the activation of TrkB, with Ca<sup>2+</sup> influx through NMDARs to facilitate the induction the plasticity in dendritic spines (Colgan et al., 2018). However, the downstream molecular mechanisms through which PKC $\alpha$  facilitates structural synaptic plasticity remains unknown.

The expression of structural plasticity, through spine enlargement and insertion of additional glutamate receptors, requires actin remodeling through the regulated activity of small GTPases including Rac1, Cdc42 and Ras (Bailey et al., 2015; Kim et al., 2014; Murakoshi et al., 2011; Patterson and Yasuda, 2011). These small GTPases are precisely coordinated across spatiotemporal domains by a complex network of GTPase accelerating proteins (GAPs) and GTPase exchange factors (GEFs), which attenuate or enhance GTPase activation respectively to mediate the cytoskeletal remodeling crucial for activity-dependent spine plasticity (Govek et al., 2005; Lai and Ip, 2013; Saneyoshi et al., 2008).

## Result

Here, we examine whether PKC $\alpha$  regulates small GTPases during the induction of plasticity. In order to study signaling in single spines during structural plasticity, we combined two-photon release of caged glutamate (Matsuzaki et al., 2001), fluorescence resonance energy transfer (FRET)-based sensors, and two-photon fluorescence lifetime imaging microscopy (2pFLIM) (Yasuda, 2012) to monitor the dynamics of intracellular signaling events with high spatiotemporal resolution. Specifically, using previously published FRET sensors, we monitored the spatiotemporal activation of the actin-regulating small GTPases, including Ras (Harvey et al., 2008; Oliveira and Yasuda, 2014; Yasuda et al., 2006), Cdc42 (Murakoshi et al., 2011) and Rac1 (Hedrick et al., 2016) during the induction of structural long-term potentiation (sLTP). Briefly, these sensors are composed of two components: (1) full length GTPase fused to green fluorescent protein (GTPase-eGFP), and (2) a specific GTPase binding domain of a

downstream effector fused to two copies of red fluorescent protein (mRFP-effector-mRFP) (Fig. 1a). Activation of the GTPase increases the affinity between the two components of the sensor and the FRET between the fluorophores. Using 2pFLIM we can monitor changes in the binding of the sensor components by quantitatively measuring decreases in the fluorescence lifetime of GFP in order to measure small GTPases activation.

We transfected organotypic hippocampal slices from wildtype (WT) or PKC $\alpha$  knockout (KO) mice with small GTPase sensors and imaged CA1 pyramidal neurons using 2pFLIM. In response to glutamate uncaging targeted to a single dendritic spine (30 pulses at 0.5 Hz), the stimulated spine from WT slices rapidly enlarged by ~150% (transient phase) and persisted with an increased volume of ~40% lasting at least 25 min (Fig. 1b, c). This structural plasticity is associated with an increase in the functional strength of the stimulated spine (Gipson and Olive, 2017; Matsuzaki et al., 2004). Consistent with previous work, hippocampal CA1 neurons from PKC $\alpha$  knockout mice showed a deficit in sLTP regardless of sensor expression (Fig. 1c, (Colgan

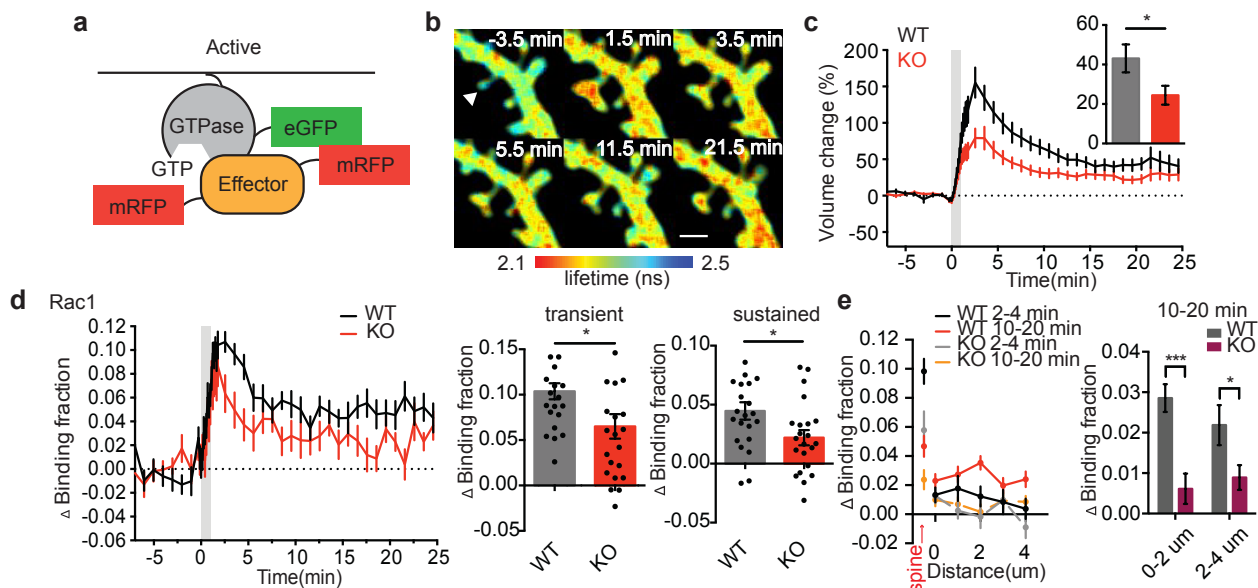

**Figure 1 | PKC regulates Rac1 activation during sLTP.** **a**, Schematic of small GTPase FRET sensors. **b**, 2pFLIM images of Rac1 activation averaged across indicated time points. Arrowhead represents point of uncaging. Warmer colors indicate shorter lifetimes and higher Rac1 activity. Scale bar, 1 $\mu$ m. **c**, Time courses and quantification of sustained (10–25 min) spine volume change induced by glutamate uncaging in neurons expressing Rac1 sensor from WT and KO littermates for PKC $\alpha$ . **d**, Time courses and quantification of transient (1.5–3.5 min) and sustained (10–25 min) Rac1 activation in stimulated spines from WT and PKC $\alpha$  KO littermates. **e**, Spatial profile and quantification of spreading Rac1 activation along the dendrite at indicated times and distances from the stimulated spine in WT and PKC $\alpha$  KO littermates. Data are mean  $\pm$  s.e.m. Grey shading indicates time of uncaging. \* $P < 0.05$ , two-tailed t-test (**c**, **d**) and two-way ANOVA with Sidak's multiple comparisons test (**e**). n (neurons/spines) = 18/22 WT and 19/22 PKC $\alpha$  KO.

et al., 2018)). When sLTP was induced in single dendritic spines, we observed rapid and sustained activation of Rac1 (Fig. 1b, d) in the WT slices that was consistent with previously reported findings (Hedrick et al., 2016). However, we found that in the absence of PKC $\alpha$  Rac1 activation during sLTP is significantly attenuated (Fig. 1d). Rac1 activity in WT mice was restricted to the stimulated spines at early time points (2 – 4 min), but spread into the dendrite and nearby spines at later time points (10 – 20 min), consistent with a previous study (Hedrick et al., 2016). In PKC $\alpha$  KO mice, Rac1 activity both in stimulated spines and adjacent dendrites were inhibited (Fig. 1e). Thus, PKC $\alpha$  positively regulates Rac1 activation to facilitate plasticity.

In order to test the specificity of PKC $\alpha$  signaling toward Rac1, we tested whether the plasticity-induced activation of other small GTPases involved in plasticity, Ras or Cdc42, (Lai and Ip, 2013; Sit and Manser, 2011; Zhu et al., 2002), was also impaired in the absence of PKC $\alpha$ . Although the impairment of sLTP was observed in PKC $\alpha$  KO neurons transfected with Ras or Cdc42 sensor (Fig. 2a, c), the activation of these two small GTPases during sLTP were not affected by loss of PKC $\alpha$  (Fig. 2b, d). This demonstrates that Rac1 but not Ras or Cdc42 is downstream of PKC $\alpha$  during sLTP.

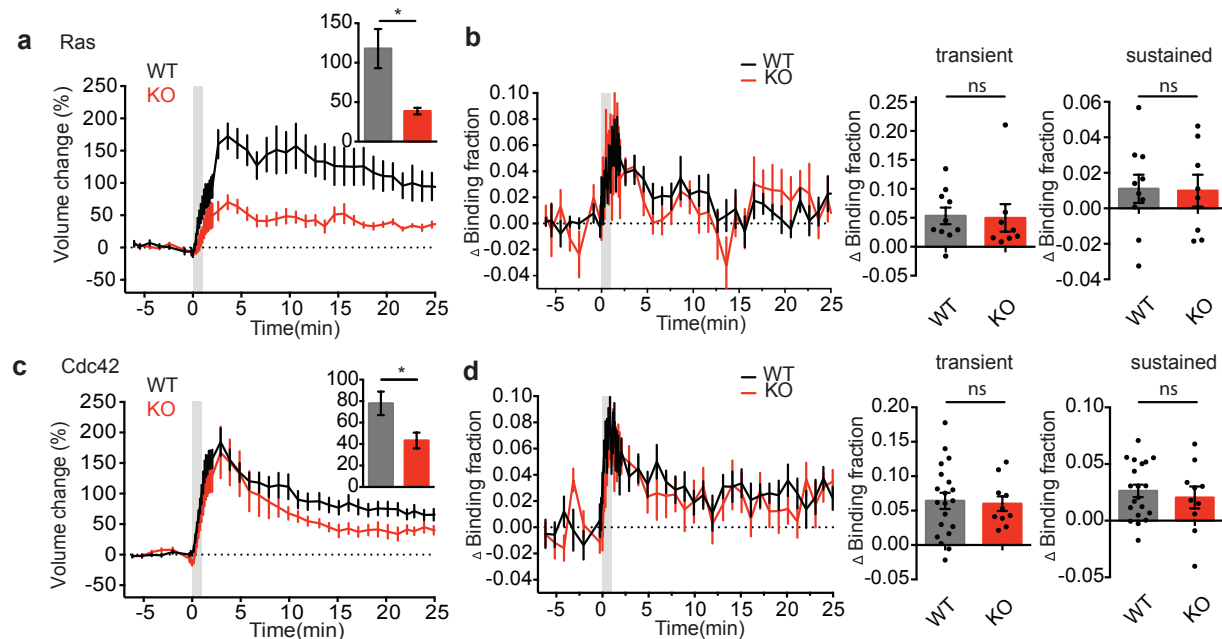

**Figure 2 | PKC $\alpha$  does not regulate Ras or Cdc42 activation during sLTP.** a,c, Time courses and quantification of sustained (10–25 min) spine volume change induced by glutamate uncaging in neurons expressing Ras1 sensor (a) or Cdc42 sensor (c) from PKC $\alpha$  WT and KO littermates. b,d, Time courses and quantification of transient (1-3 min) and sustained (10-25 min) Ras1 (b) or Cdc42 (d) activation in stimulated spines from WT and PKC $\alpha$  KO littermates. Data are mean  $\pm$  s.e.m. n(neurons/spines) Ras: n= 8/10 WT, n= 7/8 KO. Cdc42: n= 14/19 WT and n= 7/10 KO \*P < 0.05, two-tailed t-test.

We next investigated whether the PDZ binding domain of PKC $\alpha$ , which was shown to be critical for its isozyme-specific signaling in spine plasticity (Colgan et al., 2018), was required for downstream regulation of Rac1 (Fig. 3a). PKC $\alpha$  or PKC $\alpha$  lacking its PDZ binding domain was sparsely and postsynaptically expressed alongside the Rac1 sensor in hippocampal slices from PKC $\alpha$  knockout mice. We found impairment of Rac1 activation and sLTP only when the PDZ binding domain was disrupted. This finding suggests a crucial role for PDZ binding domain of PKC $\alpha$  in Rac1 activation during sLTP (Fig. 3b).

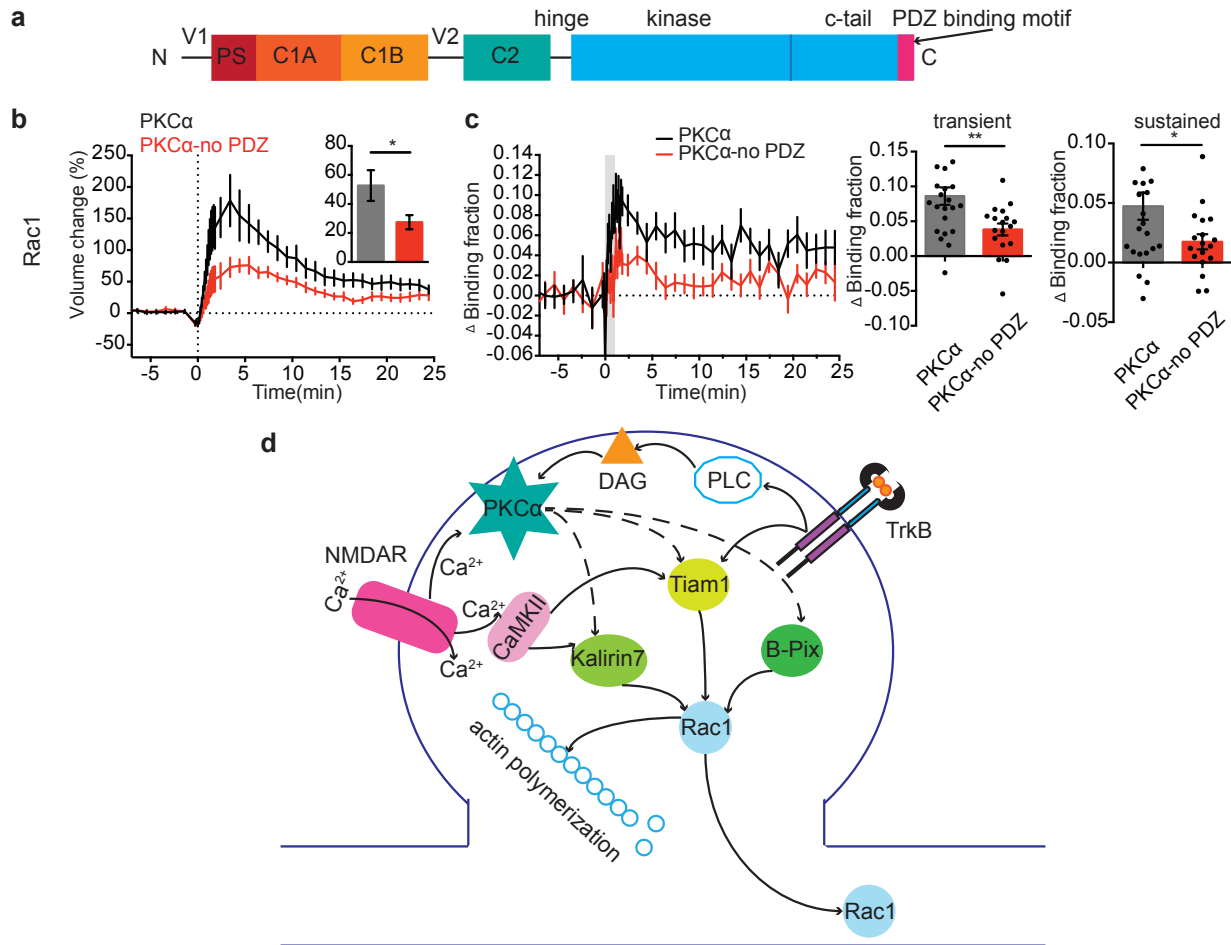

**Figure 3 | PKC $\alpha$  regulates Rac1 activation during sLTP via PDZ binding domain.** **a**, Primary structure of PKC $\alpha$  showing pseudosubstrate, C1A and C1B domains, C2 domain, kinase domain, C-terminal tail, and PDZ binding motif. **b**, **c** Time courses and quantification of sustained (10–25 min) spine volume change (**b**) and transient and sustained Rac1 activation (**c**) induced by glutamate uncaging in PKC $\alpha$  KO hippocampal neurons expressing PKC $\alpha$  and PKC $\alpha$  without PDZ domain (PKC $\alpha$ -no PDZ).  $n = 20/23$  PKC $\alpha$  and  $14/18$  PKC $\alpha$ -no PDZ (neurons/spines). Data are mean  $\pm$  s.e.m. \* $P < 0.05$ , two-tailed t-test. **d**, Schematic of potential PKC $\alpha$  regulation of Rac1.

## Discussion

In this study, we have described that PKC $\alpha$  regulates the activation of Rac1, but not Ras or Cdc42, during sLTP of dendritic spines (Fig. 3d). This modulation relies on PKC $\alpha$ 's PDZ-binding motif, which may localize PKC $\alpha$  to a signaling complex scaffold that also recruits Rac1 GTPase-activating proteins (GAPs) or Guanine nucleotide-exchange factors (GEFs). Although the specific mechanism through which PKC $\alpha$  regulates Rac1 activity remains to be determined, potential scaffolds include PICK1, SAP-97 or PSD-95, which can interact with PKC $\alpha$  through its C-terminal PDZ binding domain and have been implicated in plasticity of spines (Callender and Newton, 2017; Ehrlich et al., 2007; Nakamura et al., 2011;; Staudinger et al., 1997; Volk et al., 2010; Waites et al., 2009).

The regulation of Rac1 during plasticity through GAPs and GEFs is highly complex in order to allow for tightly-regulated remodeling of various cytoskeletal domains in a precise spatial and temporal pattern. While PKC $\alpha$  could modulate Rac1 through inhibition of a GAP or Rho GDP dissociation inhibitors (RhoGDIs) (Garcia-Mata et al., 2011; Van Aelst and D'Souza-Schorey, 1997; Zhang et al., 1998), much of the specificity of Rac1 GTPase signaling is reportedly regulated by GEFs (Bellanger et al., 2000; Cook et al., 2014; Van Aelst and D'Souza-Schorey, 1997). At least ten different RhoGEFs have been identified to be localized to the post-synaptic density (Kiraly et al., 2010). Of these, Kalirin 7, Tiam1 and B-Pix all show preferential GEF activity for Rac1, are able to be phosphorylated by classic PKC isozymes in-vitro and are required for sLTP of spines (Buchanan et al., 2000; Chen et al., 2012; Fleming et al., 1999, 1997; Mandela and Ma, 2012; Mertens et al., 2003; Shirafuji et al., 2014; Saneyoshi et al., 2019). Kalirin7 and B-Pix also contain a PDZ binding domain which could localize them to PDZ containing-scaffolds together with activated PKC $\alpha$  (Park et al., 2003; Penzes et al., 2001; Saneyoshi et al., 2019). On the other hand, although Tiam1 itself contains a PDZ domain, the structure of its PDZ domain does not predict PKC $\alpha$  as a preferred binding partner (Shepherd et al., 2010).

Both Rac1 and PKC $\alpha$  activation are downstream of TrkB receptor activation in the stimulated spine (Colgan et al., 2018; Hedrick et al., 2016) (Fig. 3d). One important future direction is to determine if TrkB-dependent activation of Rac1 is solely through PKC $\alpha$  or whether a more complex feedback loop is in play. The increased activity and spreading of Rac1 promoted by PKC $\alpha$  is consistent with an essential role for PKC $\alpha$  in integrating neurotrophic signals to facilitate plasticity. Moreover, this link between PKC $\alpha$  and Rac1 supports a growing

understanding of the molecular mechanisms underlying heterosynaptic facilitation, whereby the induction of plasticity in one spine lowers the threshold of plasticity induction in nearby spines (Colgan et al., 2018; Hedrick et al., 2016).

This study identified a novel molecular pathway that links short-lived calcium influx and activation of PKC $\alpha$ , to long-lasting Rac1 activation and changes in spine structure. Taken together with previous findings that another Ca<sup>2+</sup>-dependent kinase, CaMKII, also activates Rac1 during sLTP (Saneyoshi et al., 2019; Hedrick et al., 2016), Rac1 appears to be a key convergence point of multiple upstream calcium-dependent pathways (Fig. 3d). We anticipate that the better understanding of Rac1 signaling pathway may ultimately help us to uncover the signaling network with which memories are encoded.

## Materials and Methods

**Animals:** All experimental procedures were approved by the Max Planck Florida Institute for Neuroscience Animal Care and Use Committee. P4-P8 mouse pups from both sexes were used for organotypic slices for imaging studies. The genotype of each animal was verified before preparing slices. PKC $\alpha$  KO 129/sv animals were received from Dr. Michael Leitges. Animals were crossed to C57Bl/6N CrI and are on a mixed background. For all the experiments WT littermates were used as controls for KO animals.

**Plasmids:** All the plasmids used were previously developed and described in publication and are available on Addgene (Colgan et al., 2018; Hedrick et al., 2016; Oliveira and Yasuda, 2013). Briefly, the Rac1 sensor consisted of mEGFP-Rac1 (Addgene #83950) and mCherry-PAK2 binding domain-mCherry (Addgene #83951), the Ras sensor consisted of pCI-mEGFP-HRas ((Addgene #18666) and pCI-mRFP-RBD<sup>K65E,K108A</sup>- mRFP (Addgene #45149), the Cdc42 sensor consisted of mEGFP-Cdc42 (Addgene #29673) and mCherry-Pak3(60-113)/S74A/F84A-mCherry-C1 (Addgene #29676).

**Organotypic hippocampal slice cultures and transfection:** Organotypic hippocampal slices were prepared from wildtype or transgenic postnatal 4-8 day old mouse pups of both sexes as previously described (Stoppini et al., 1991). In brief, the animals were anaesthetized with isoflurane, after which the animal was quickly decapitated and the brain removed. The hippocampi were dissected and cut into 350  $\mu$ m thick coronal hippocampal slices using a McIlwain tissue chopper (Ted Pella, Inc) and plated on hydrophilic PTFE membranes (Millicell,

Millipore) fed by culture medium containing MEM medium (Life Technologies), 20% horse serum, 1mM L-Glutamine, 1mM CaCl<sub>2</sub>, 2mM MgSO<sub>4</sub>, 12.9mM D-Glucose, 5.2mM NaHCO<sub>3</sub>, 30mM HEPES, 0.075% Ascorbic Acid, 1µg/ml Insulin. Slices were incubated at 37 °C in 5% CO<sub>2</sub>. After 7-12 days in culture, CA1 pyramidal neurons were transfected with biolistic gene transfer (O'Brien and Lummis, 2006) using 1.0 µm gold beads (8–12 mg) coated with plasmids containing 50 µg of total cDNA of interest in the following ratios. Rac1 sensor, donor: acceptor = 1:2; Rac1 sensor plus PKCα, donor: acceptor: PKCα = 1:2:1; Rac1 sensor plus PKCα without PDZ binding domain, donor: acceptor: PKCα- no PDZ domain = 1:2:1; Ras sensor, donor: acceptor = 1:3; Cdc42 sensor, donor: acceptor = 1:1). Neurons expressing all plasmid combinations were imaged 2–5 days after transfection.

**2pFLIM.** FLIM imaging using a custom-built two-photon fluorescence lifetime imaging microscope was performed as previously described (Murakoshi et al., 2011). 2pFLIM imaging was performed using a Ti-sapphire laser (Coherent, Cameleon) at a wavelength of 920 nm with a power of 1.4-1.6 mW. Fluorescence emission was collected using an immersion objective (60×, numerical aperture 0.9, Olympus), divided with a dichroic mirror (565 nm) and detected with two separated photoelectron multiplier tubes placed after wavelength filters (Chroma, 510/70-2p for green and 620/90-2p for red). Both red and green channels were fit with photoelectron multiplier tubes (PMT) having a low transfer time spread (H7422-40p; Hamamatsu) to allow for fluorescence lifetime imaging. Photon counting for fluorescence lifetime imaging was performed using a time-correlated single photon counting board (SPC-150; Becker and Hickl) and fluorescence images were acquired with PCI-6110 (National instrument) using modified ScanImage (Pologruto et al., 2003)([https://github.com/ryoheiyasuda/FLIMimage\\_Matlab\\_ScanImage](https://github.com/ryoheiyasuda/FLIMimage_Matlab_ScanImage)). Intensity images for analysis of sLTP volume changes were collected by 128x128 pixels as a z stack of three slices with 1 µm separation and averaging 6 frames/slice. Spine volume was measured as the integrated fluorescent intensity of EGFP after subtracting background (F). Spine volume change was calculated by  $F/F_0$ , in which  $F_0$  is the average spine intensity before stimulation.

**Two-photon glutamate uncaging.** A second Ti-sapphire laser tuned at a wavelength of 720 nm was used to uncage 4-methoxy-7-nitroindolyl-caged-l- glutamate (MNI-caged glutamate) in extracellular solution with a train of 4–8 ms, 2.8-3.0 mW pulses (30 times at 0.5 Hz) in a small region ~0.5 µm from the spine of interest as previously described(Colgan et al., 2018). Experiments were performed in Mg<sup>2+</sup> free artificial cerebral spinal fluid (ACSF; 127 mM NaCl, 2.5 mM KCl, 4 mM CaCl<sub>2</sub>, 25 mM NaHCO<sub>3</sub>, 1.25 mM NaH<sub>2</sub>PO<sub>4</sub> and 25 mM glucose) containing 1



$\mu\text{M}$  tetrodotoxin (TTX) and 4 mM MNI-caged L-glutamate aerated with 95%  $\text{O}_2$  and 5%  $\text{CO}_2$ . Experiments were performed at room temperature.

**2pFLIM analysis:** To measure the fraction of donor that was undergoing FRET with acceptor (Binding Fraction), we fit a fluorescence lifetime curve summing all pixels over a whole image with a double exponential function convolved with the Gaussian pulse response function:

$$F(t) = F_0[P_D H(t, t_0, \tau_D, \tau_G) + P_{AD} H(t, t_0, \tau_{AD}, \tau_G)]$$

where  $\tau_{AD}$  is the fluorescence lifetime of donor bound with acceptor,  $P_D$  and  $P_{AD}$  are the fraction of free donor and donor undergoing FRET with acceptor, respectively, and  $H(t)$  is a fluorescence lifetime curve with a single exponential function convolved with the Gaussian pulse response function:

$$H(t, t_0, \tau_D, \tau_G) = \frac{1}{2} \exp\left(\frac{\tau_G^2}{2\tau_D^2} - \frac{t-t_0}{\tau_i}\right) \text{erfc}\left(\frac{\tau_G^2 - \tau_D(t-t_0)}{\sqrt{2\tau_D\tau_G}}\right),$$

in which  $\tau_D$  is the fluorescence lifetime of the free donor,  $\tau_G$  is the width of the Gaussian pulse response function,  $F_0$  is the peak fluorescence before convolution and  $t_0$  is the time offset, and erfc is the complementary error function.

We fixed  $\tau_D$  to the fluorescence lifetime obtained from free eGFP (2.6 ns), and then fixed  $\tau_{AD}$  to fluorescence lifetime of the donor bound with acceptor (1.1 ns). For experimental data, we fixed  $\tau_D$  and  $\tau_{AD}$  to these values to obtain stable fitting. To generate the fluorescence lifetime image, we calculated the mean photon arrival time,  $\langle t \rangle$ , in each pixel as:

$$\langle t \rangle = \int tF(t) dt / \int F(t) dt,$$

Then, the mean photon arrival time is related to the mean fluorescence lifetime,  $\langle \tau \rangle$ , by an offset arrival time,  $t_0$ , which is obtained by fitting the whole image:

$$\langle \tau \rangle = \langle t \rangle - t_0.$$

For small regions-of-interest (ROIs) in an image (spines or dendrites), we calculated the binding fraction ( $P_{AD}$ ) as:

$$P_{AD} = \tau_D (\tau_D - \langle \tau \rangle) (\tau_D - \tau_{AD})^{-1} (\tau_D + \tau_{AD} - \langle \tau \rangle)^{-1}.$$

Data with lifetime fluctuations in the baseline that were greater than .15 ns were excluded before further analysis.

**Statistical analysis.** All values are presented as mean  $\pm$  SEM unless otherwise noted. Number of independent measurements (n[neurons/spines]) is indicated in figure legends. Unpaired two-tailed student's t test was used for comparing two independent samples. Two-way ANOVA followed by multiple comparison test was used to compare grouped data sets (Prism 6, GraphPad). Data were only excluded if obvious signs of poor cellular health (for example, dendritic blebbing, spine collapse) were apparent.

### Acknowledgements

We would like to thank Dr. Michael Leitges for the PKC $\alpha$  KO 129/sv animals; M. Dowdy and the MPFI ARC for animal care; members of the Yasuda laboratory for discussion; L. Yan for helping with the microscope; and D. Kloetzer for managing the laboratory. This work was funded by NIH (R01MH080047, DP1NS096787) and the Max Planck Florida Institute for Neuroscience.

### Reference:

- Bailey CH, Kandel ER, Harris KM. 2015. Structural Components of Synaptic Plasticity and Memory Consolidation. *Cold Spring Harb Perspect Biol* **7**. doi:10.1101/cshperspect.a021758
- Bellanger J-M, Astier C, Sardet C, Ohta Y, Stossel TP, Debant A. 2000. The Rac1- and RhoG-specific GEF domain of Trio targets filamin to remodel cytoskeletal actin. *Nat Cell Biol* **2**:888–892. doi:10.1038/35046533
- Buchanan FG, Elliot CM, Gibbs M, Exton JH. 2000. Translocation of the Rac1 guanine nucleotide exchange factor Tiam1 induced by platelet-derived growth factor and lysophosphatidic acid. *J Biol Chem* **275**:9742–8. doi:10.1074/jbc.275.13.9742
- Callender JA, Newton AC. 2017. Conventional protein kinase C in the brain: 40 years later. *Neuronal Signal* **1**:NS20160005. doi:10.1042/NS20160005
- Chen J-Y, Lin Y-Y, Jou T-S. 2012. Phosphorylation of EBP50 negatively regulates  $\beta$ -PIX-dependent Rac1 activity in anoikis. *Cell Death Differ* **19**:1027–37. doi:10.1038/cdd.2012.4
- Clark EA, Leach KL, Trojanowski JQ, Lee VM. 1991. Characterization and differential distribution of the three major human protein kinase C isozymes (PKC alpha, PKC beta, and PKC gamma) of the central nervous system in normal and Alzheimer's disease brains. *Lab Invest* **64**:35–44.

- Colgan LA, Hu M, Mislser JA, Parra-Bueno P, Moran CM, Leitges M, Yasuda R. 2018. PKC $\alpha$  integrates spatiotemporally distinct Ca<sup>2+</sup> and autocrine BDNF signaling to facilitate synaptic plasticity. *Nat Neurosci* **21**:1027–1037. doi:10.1038/s41593-018-0184-3
- Colgan LA, Yasuda R. 2014. Plasticity of dendritic spines: subcompartmentalization of signaling. *Annu Rev Physiol* **76**:365–385. doi:10.1146/annurev-physiol-021113-170400
- Cook DR, Rossman KL, Der CJ. 2014. Rho guanine nucleotide exchange factors: regulators of Rho GTPase activity in development and disease. *Oncogene* **33**:4021–35. doi:10.1038/onc.2013.362
- Ehrlich I, Klein M, Rumpel S, Malinow R. 2007. PSD-95 is required for activity-driven synapse stabilization. *Proc Natl Acad Sci U S A* **104**:4176–81. doi:10.1073/pnas.0609307104
- Fleming IN, Elliott CM, Buchanan FG, Downes CP, Exton JH. 1999. Ca<sup>2+</sup>/calmodulin-dependent protein kinase II regulates Tiam1 by reversible protein phosphorylation. *J Biol Chem* **274**:12753–8. doi:10.1074/jbc.274.18.12753
- Fleming IN, Elliott CM, Collard JG, Exton JH. 1997. Lysophosphatidic Acid Induces Threonine Phosphorylation of Tiam1 in Swiss 3T3 Fibroblasts via Activation of Protein Kinase C. *J Biol Chem* **272**:33105–33110. doi:10.1074/jbc.272.52.33105
- Fu AK, Ip NY. 2017. Regulation of postsynaptic signaling in structural synaptic plasticity. *Curr Opin Neurobiol* **45**:148–155. doi:10.1016/J.CONB.2017.05.016
- Garcia-Mata R, Boulter E, Burridge K. 2011. The “invisible hand”: regulation of RHO GTPases by RHOGDIs. *Nat Publ Gr* **12**:493. doi:10.1038/nrm3153
- Gipson CD, Olive MF. 2017. Structural and functional plasticity of dendritic spines - root or result of behavior? *Genes, Brain Behav* **16**:101–117. doi:10.1111/gbb.12324
- Govek E-E, Newey SE, Van Aelst L. 2005. The role of the Rho GTPases in neuronal development. *Genes Dev* **19**:1–49. doi:10.1101/gad.1256405
- Harvey CD, Yasuda R, Zhong H, Svoboda K. 2008. The spread of Ras activity triggered by activation of a single dendritic spine. *Science* **321**:136–40. doi:10.1126/science.1159675
- Hedrick NG, Harward SC, Hall CE, Murakoshi H, McNamara JO, Yasuda R. 2016. Rho GTPase complementation underlies BDNF-dependent homo- and heterosynaptic plasticity. *Nature*. doi:10.1038/nature19784
- Hu G-Y, Hvalby Ø, Walaas SI, Albert KA, Skjeflo P, Andersen P, Greengard P. 1987. Protein kinase C injection into hippocampal pyramidal cells elicits features of long term potentiation. *Nature* **328**:426–429. doi:10.1038/328426a0
- Ito A, Saito N, Hirata M, Kose A, Tsujino T, Yoshihara C, Ogita K, Kishimoto A, Nishizuka Y, Tanaka C. 1990. Immunocytochemical localization of the alpha subspecies of protein

- kinase C in rat brain. *Proc Natl Acad Sci U S A* **87**:3195–9. doi:10.1073/pnas.87.8.3195
- Kennedy MB. 2016. Synaptic Signaling in Learning and Memory. *Cold Spring Harb Perspect Biol* **8**:a016824. doi:10.1101/cshperspect.a016824
- Kim IH, Wang H, Soderling SH, Yasuda R. 2014. Loss of Cdc42 leads to defects in synaptic plasticity and remote memory recall. *Elife* **3**. doi:10.7554/eLife.02839
- Kiraly DD, Eipper-Mains JE, Mains RE, Eipper BA. 2010. Synaptic plasticity, a symphony in GEF. *ACS Chem Neurosci* **1**:348–365. doi:10.1021/cn100012x
- Kose A, Ito A, Saito N, Tanaka C. 1990. Electron microscopic localization of gamma- and beta II-subspecies of protein kinase C in rat hippocampus. *Brain Res* **518**:209–17. doi:10.1016/0006-8993(90)90974-g
- Lai K-O, Ip NY. 2013. Structural plasticity of dendritic spines: The underlying mechanisms and its dysregulation in brain disorders. *Biochim Biophys Acta - Mol Basis Dis* **1832**:2257–2263. doi:10.1016/J.BBADIS.2013.08.012
- Lamprecht R, LeDoux J. 2004. Structural plasticity and memory. *Nat Rev Neurosci* **5**:45–54. doi:10.1038/nrn1301
- Lee H-K. 2006. Synaptic plasticity and phosphorylation. *Pharmacol Ther* **112**:810–32. doi:10.1016/j.pharmthera.2006.06.003
- Malinow R, Madison D V., Tsien RW. 1988. Persistent protein kinase activity underlying long-term potentiation. *Nature* **335**:820–824. doi:10.1038/335820a0
- Malinow R, Schulman H, Tsien RW. 1989. Inhibition of postsynaptic PKC or CaMKII blocks induction but not expression of LTP. *Science* **245**:862–6. doi:10.1126/science.2549638
- Mandela P, Ma X-M. 2012. Kalirin, a Key Player in Synapse Formation, Is Implicated in Human Diseases. *Neural Plast* **2012**:1–9. doi:10.1155/2012/728161
- Matsuzaki M, Ellis-Davies GCR, Nemoto T, Miyashita Y, Iino M, Kasai H. 2001. Dendritic spine geometry is critical for AMPA receptor expression in hippocampal CA1 pyramidal neurons. *Nat Neurosci* **4**:1086–1092. doi:10.1038/nn736
- Matsuzaki M, Honkura N, Ellis-Davies GC, Kasai H. 2004. Structural basis of long-term potentiation in single dendritic spines. *Nature* **429**:761–766. doi:10.1038/nature02617
- Mertens AE, Roovers RC, Collard JG. 2003. Regulation of Tiam1-Rac signalling. *FEBS Lett* **546**:11–16. doi:10.1016/S0014-5793(03)00435-6
- Muller D, Buchs P-A, Stoppini L, Boddeke H. 1991. Long-Term Potentiation, Protein Kinase C, and Glutamate Receptors Introduction Steps of LTP Cellular Actions of PKC PKC and Synaptic Transmission PKC and LTP Induction Mechanisms Role for a Transient Activation of PKC in LTP Role of PKC in the Maintenance Phase of LTP Differences Between

Phorbol Ester-Induced Synaptic Enhancement and LTP Effects of PKC Antagonists on the Maintenance Phase of LTP Conclusion Acknowledgments References, Molecular Neurobiology.

- Murakoshi H, Wang H, Yasuda R. 2011. Local, persistent activation of Rho GTPases during plasticity of single dendritic spines. *Nature* **472**:100–4. doi:10.1038/nature09823
- Nakamura Y, Wood CL, Patton AP, Jaafari N, Henley JM, Mellor JR, Hanley JG. 2011. PICK1 inhibition of the Arp2/3 complex controls dendritic spine size and synaptic plasticity. *EMBO J* **30**:719–30. doi:10.1038/emboj.2010.357
- Nelson TJ, Sun MK, Hongpaisan J, Alkon DL. 2008. Insulin, PKC signaling pathways and synaptic remodeling during memory storage and neuronal repair. *Eur J Pharmacol* **585**:76–87. doi:10.1016/j.ejphar.2008.01.051
- Nishiyama J, Yasuda R. 2015. Biochemical Computation for Spine Structural Plasticity. *Neuron* **87**:63–75. doi:http://dx.doi.org/10.1016/j.neuron.2015.05.043
- O'Brien JA, Lummis SCR. 2006. Biolistic transfection of neuronal cultures using a hand-held gene gun. *Nat Protoc* **1**:977–81. doi:10.1038/nprot.2006.145
- O'Neill AK, Gallegos LL, Justilien V, Garcia EL, Leitges M, Fields AP, Hall RA, Newton AC. 2011. Protein kinase C $\alpha$  promotes cell migration through a PDZ-dependent interaction with its novel substrate discs large homolog 1 (DLG1). *J Biol Chem* **286**:43559–68. doi:10.1074/jbc.M111.294603
- Oliveira AF, Yasuda R. 2014. Imaging the activity of Ras superfamily GTPase proteins in small subcellular compartments in neurons. *Methods Mol Biol* **1071**:109–128. doi:10.1007/978-1-62703-622-1\_9
- Oliveira AF, Yasuda R. 2013. An improved Ras sensor for highly sensitive and quantitative FRET-FLIM imaging. *PLoS One* **8**:e52874. doi:10.1371/journal.pone.0052874
- Park E, Na M, Choi J, Kim S, Lee J-R, Yoon J, Park D, Sheng M, Kim E. 2003. The Shank family of postsynaptic density proteins interacts with and promotes synaptic accumulation of the beta PIX guanine nucleotide exchange factor for Rac1 and Cdc42. *J Biol Chem* **278**:19220–9. doi:10.1074/jbc.M301052200
- Patterson M, Yasuda R. 2011. Signalling pathways underlying structural plasticity of dendritic spines. *Br J Pharmacol* **163**:1626–1638. doi:10.1111/j.1476-5381.2011.01328.x
- Penzes P, Johnson RC, Sattler R, Zhang X, Huganir RL, Kambampati V, Mains RE, Eipper BA. 2001. The Neuronal Rho-GEF Kalirin-7 Interacts with PDZ Domain-Containing Proteins and Regulates Dendritic Morphogenesis. *Neuron* **29**:229–242. doi:10.1016/S0896-6273(01)00193-3

- Pologruto TA, Sabatini BL, Svoboda K. 2003. ScanImage: Flexible software for operating laser scanning microscopes. *Biomed Eng Online* **2**:13. doi:10.1186/1475-925X-2-13
- Rekart JL, Meiri K, Routtenberg A. 2005. Hippocampal-dependent memory is impaired in heterozygous GAP-43 knockout mice. *Hippocampus* **15**:1–7. doi:10.1002/hipo.20045
- Saneyoshi T, Matsuno H, Suzuki A, Murakoshi H, Hedrick NG, Agnello E, O'Connell R, Stratton MM, Yasuda R, Hayashi Y. 2019. Reciprocal Activation within a Kinase-Effector Complex Underlying Persistence of Structural LTP. *Neuron* **102**:1199-1210.e6. doi:10.1016/J.NEURON.2019.04.012
- Saneyoshi T, Wayman G, Fortin D, Davare M, Hoshi N, Nozaki N, Natsume T, Soderling TR. 2008. Activity-dependent synaptogenesis: regulation by a CaM-kinase kinase/CaM-kinase I/betaPIX signaling complex. *Neuron* **57**:94–107. doi:10.1016/j.neuron.2007.11.016
- Shepherd TR, Klaus SM, Liu X, Ramaswamy S, DeMali KA, Fuentes EJ. 2010. The Tiam1 PDZ Domain Couples to Syndecan1 and Promotes Cell–Matrix Adhesion. *J Mol Biol* **398**:730–746. doi:10.1016/J.JMB.2010.03.047
- Shirafuji T, Ueyama T, Yoshino K, Takahashi H, Adachi N, Ago Y, Koda K, Nashida T, Hiramatsu N, Matsuda T, Toda T, Sakai N, Saito N. 2014. The role of Pak-interacting exchange factor- $\beta$  phosphorylation at serines 340 and 583 by PKC $\gamma$  in dopamine release. *J Neurosci* **34**:9268–80. doi:10.1523/JNEUROSCI.4278-13.2014
- Sit S-T, Manser E. 2011. Rho GTPases and their role in organizing the actin cytoskeleton. *J Cell Sci* **124**:679–83. doi:10.1242/jcs.064964
- Sossin WS. 2007. Isoform specificity of protein kinase Cs in synaptic plasticity. *Learn Mem* **14**:236–246. doi:10.1101/LM.469707
- Staudinger J, Lu J, Olson EN. 1997. Specific interaction of the PDZ domain protein PICK1 with the COOH terminus of protein kinase C- $\alpha$ . *J Biol Chem* **272**:32019–24. doi:10.1074/jbc.272.51.32019
- Stoppini L, Buchs P-A, Muller D. 1991. A simple method for organotypic cultures of nervous tissue. *J Neurosci Methods* **37**:173–182. doi:10.1016/0165-0270(91)90128-M
- Van Aelst L, D'Souza-Schorey C. 1997. Rho GTPases and signaling networks. *Genes Dev* **11**:2295–322. doi:10.1101/gad.11.18.2295
- Volk L, Kim C-H, Takamiya K, Yu Y, Huganir RL. 2010. Developmental regulation of protein interacting with C kinase 1 (PICK1) function in hippocampal synaptic plasticity and learning. *Proc Natl Acad Sci U S A* **107**:21784–9. doi:10.1073/pnas.1016103107
- Waites CL, Specht CG, Härtel K, Leal-Ortiz S, Genoux D, Li D, Drisdell RC, Jeyifous O, Cheyne JE, Green WN, Montgomery JM, Garner CC. 2009. Synaptic SAP97 isoforms regulate

AMPA receptor dynamics and access to presynaptic glutamate. *J Neurosci* **29**:4332–45.

doi:10.1523/JNEUROSCI.4431-08.2009

Yasuda R. 2012. Imaging intracellular signaling using two-photon fluorescent lifetime imaging microscopy. *Cold Spring Harb Protoc* **2012**:1121–1128. doi:10.1101/pdb.top072090

Yasuda R, Harvey CD, Zhong H, Sobczyk A, van Aelst L, Svoboda K. 2006. Supersensitive Ras activation in dendrites and spines revealed by two-photon fluorescence lifetime imaging.

*Nat Neurosci* **9**:283–291. doi:10.1038/nn1635

Zhang B, Chernoff J, Zheng Y. 1998. Interaction of Rac1 with GTPase-activating Proteins and Putative Effectors A COMPARISON WITH Cdc42 AND RhoA\*.

Zhang G-R, Wang X, Kong L, Lu X-G, Lee B, Liu M, Sun M, Franklin C, Cook RG, Geller AI.

2005. Genetic enhancement of visual learning by activation of protein kinase C pathways in small groups of rat cortical neurons. *J Neurosci* **25**:8468–81.

doi:10.1523/JNEUROSCI.2271-05.2005

Zhu JJ, Qin Y, Zhao M, Van Aelst L, Malinow R. 2002. Ras and Rap Control AMPA Receptor

Trafficking during Synaptic Plasticity. *Cell* **110**:443–455. doi:10.1016/S0092-8674(02)00897-8

## Author details

### Xun Tu

- Neuronal Signal Transduction Group, Max Planck Florida Institute for Neuroscience, Jupiter, FL, USA.
- International Max Planck Research School for Brain and Behavior, Jupiter, FL, USA.
- FAU/Max Planck Florida Institute Joint Graduate Program in Integrative Biology and Neuroscience, Florida Atlantic University, Boca Raton, FL, USA.

## Contribution

Conceptualization, Designed the experiments, Data curation, Formal analysis, Validation, Investigation, Visualization, Writing—original draft, Writing—review and editing

## Competing interests

No competing interests declared

## Ryohei Yasuda

Neuronal Signal Transduction Group, Max Planck Florida Institute for Neuroscience, Jupiter, FL, USA.

### **Contribution**

Conceptualization, Supervision, Designed the experiments, Writing—review and editing

### **Competing interests**

RY is a founder and a share holder of Florida Lifetime Imaging LLC, a company that helps people set up FLIM.

### **Lesley A Colgan**

Neuronal Signal Transduction Group, Max Planck Florida Institute for Neuroscience, Jupiter, FL, USA.

### **Contribution**

Conceptualization, Investigation, Designed the experiments, Writing—review and editing

### **Competing interests**

No competing interests declared

### **Funding**

NIH (R01MH080047, DP1NS096787), Louis Srybnik Foundation, Brain Research Foundation
